# Supplementary material for: Visible light assisted photocatalytic degradation of crystal violet dye and electrochemical detection of ascorbic acid using a BiVO4/FeVO4 heterojunction composite
Source: Royal Society of Chemistry journal article supplement (doi:10.1039/c8ra03890b), 2018-01-01
Supplement: c8ra03890b1.pdf [file c8ra03890b1.pdf]

## Visible light assisted photocatalytic degradation of crystal violet dye and electrochemical detection of ascorbic acid using $\text{BiVO}_4/\text{FeVO}_4$ heterojunction composite

Muhammad Munir Sajid<sup>a, b, c</sup>, Sadaf Bashir Khan<sup>b</sup>, Naveed Akthar Shad<sup>a,c</sup>, Nasir Amin<sup>a</sup> and Zhengjun Zhang<sup>\*d</sup>

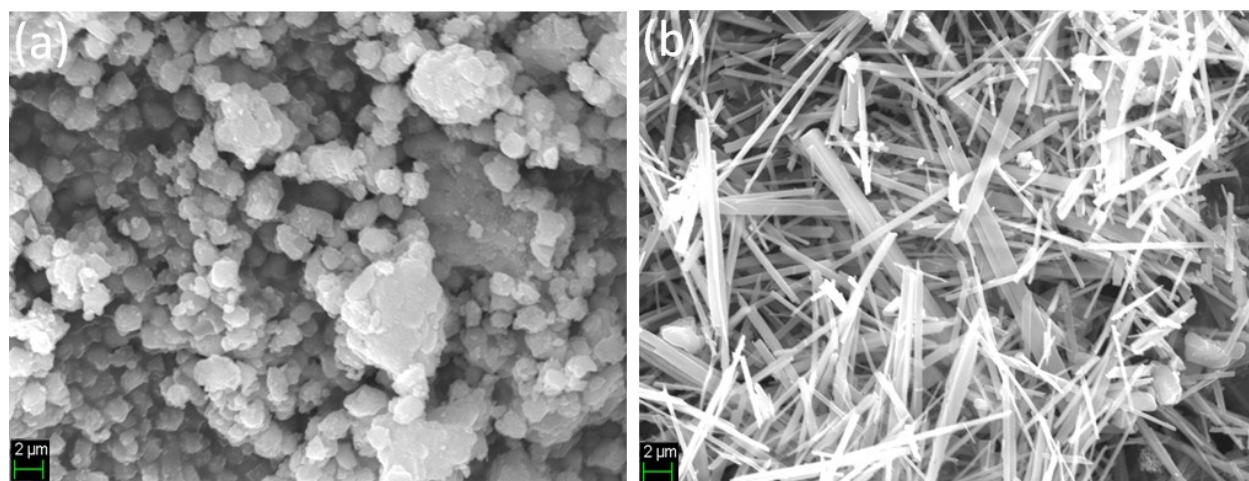

**Figure. S1** Show the SEM images of pure (a)  $\text{BiVO}_4$  and (b)  $\text{FeVO}_4$

The morphology of pure  $\text{BiVO}_4$  and  $\text{FeVO}_4$  was investigated by FESEM JEOL-7001F, in figure S1 the SEM images reveals the nanoparticles and rod like shaped morphology of  $\text{BiVO}_4$  and  $\text{FeVO}_4$ , respectively.

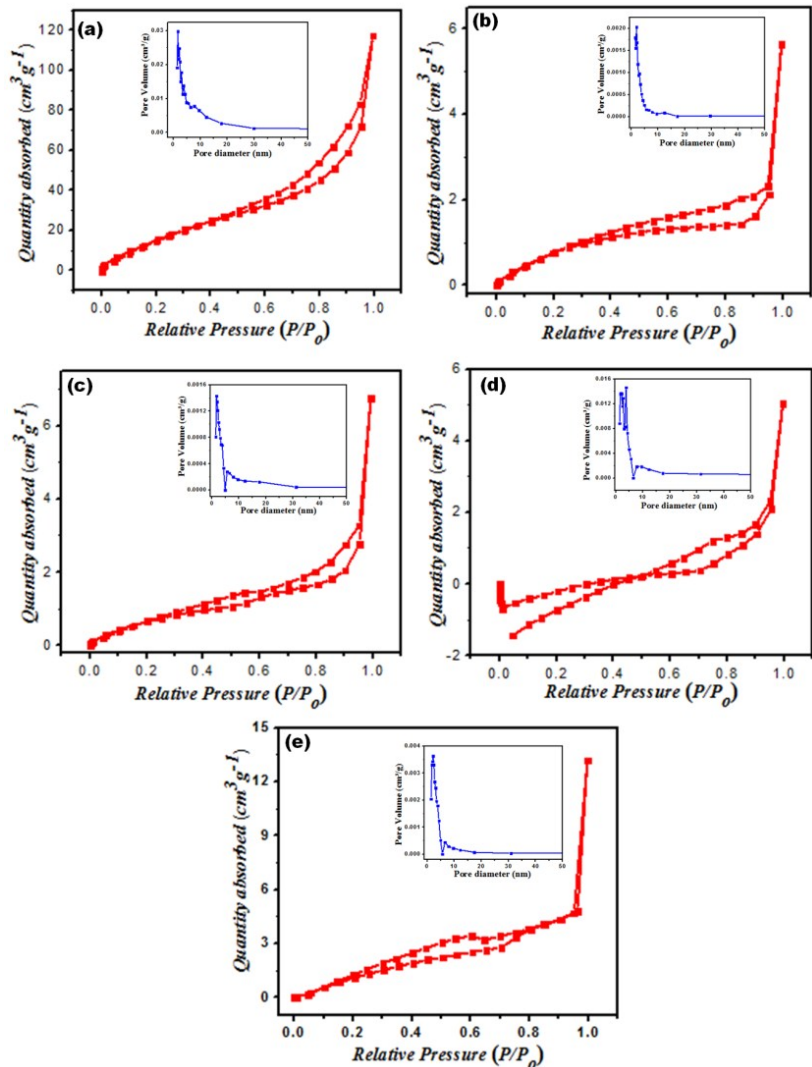

**Figure. S2** Show the  $N_2$  gas isotherms at 77.5 K of  $BiVO_4/FeVO_4$  nanocomposite at a different mole ratio at (a) 1:5 (b) 1:2 (c) 1:1 (d) 5:1 and (e) 10:1 the BET surface area and BJH pore size in inset.

We find out existence of hysteresis loop in the all-inclusive  $BiVO_4/FeVO_4$  nanocomposites, between the adsorption and desorption treat during  $N_2$  isotherm; as in figure S1 all the materials belongs different adsorption type of curves to the  $H_2$  and  $H_3$  typical hysteresis; at concentration 1:5, 1:1 of  $BiVO_4/FeVO_4$  corresponds to type III curve of  $H_3$ , at 1:2 and 5:1 concentration correspond to type II curve of  $H_3$  and at concentration value 10:1 the type II curve of  $H_2$ . The  $H_2$  and  $H_3$  type is related to the parallel wall, slit shapes capillaries, particles aggregate and narrow bottle shape either both ends open or closed give lamellar centre structure and slit form pores<sup>1 2</sup>. The precipitous reduction in desorption isotherm of all  $BiVO_4/FeVO_4$  flows from to cavitation and percolation.

Crystal Violet ( $C_{25}H_{30}ClN_3$ ) a synthetic dye represents the mixing of tetramethyl, pentamethyl, hexamethyl and parrosanilines and normally utilized in fabric manufactures for colour purposes, has a triarylmethane structure as shown in figure S<sub>2</sub>. It is toxic in nature as it gives toxic output as carbon monoxide, carbon dioxide, nitrogen oxides and hydrogen chlorides stimulate harmful effects on human, agrarian and on aquatic life<sup>3 4</sup>.

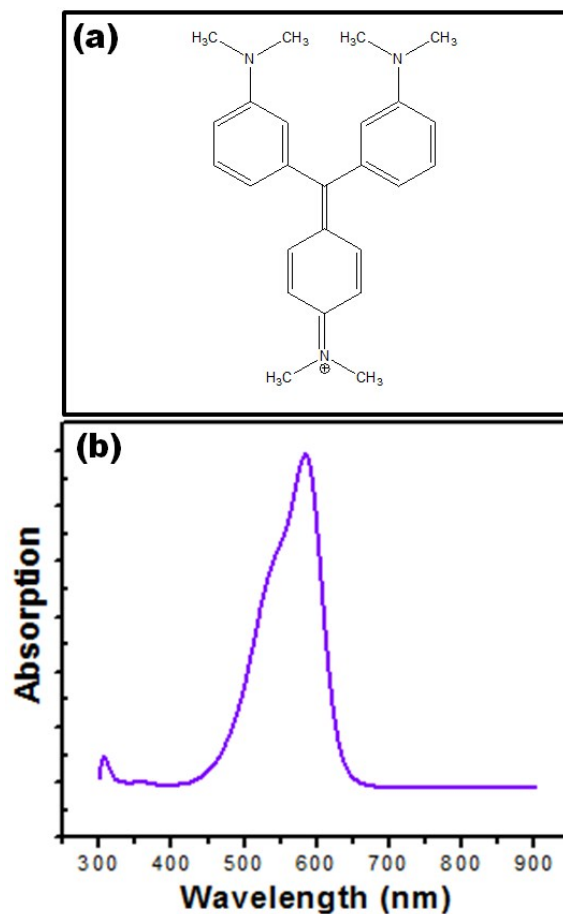

**Figure S3 (a)** Structure **(b)** adsorption spectrum of Crystal violet (CV) used as sample dye

The different mole ratio of  $\text{BiVO}_4/\text{FeVO}_4$  heterojunction nanophotocatalyst affects the photocatalytic activity due to surface charge, particle size of nanostructures, it influence the absorption and/or desorption rate of dye which causes of the effect the photocatalytic response of the purposed materials<sup>5</sup>. Figure S3 (a-f) shows the spectra recorded for different mole ratios values of  $\text{BiVO}_4/\text{FeVO}_4$  1:5, 1:2, 1:1, 2:1, 5:1, 10:1 during the degradation of crystal violet dye solution at neutral pH value. It shows that at higher concentration of  $\text{FeVO}_4$ , the degrading is higher in the beginning than decreases. When the  $\text{BiVO}_4$  ratio is increased again the photocatalytic activity decreased. The highest degradation efficiency 99.1% at mole ratio 2:1 in 60 mints was recorded. It may be due to optimum ratio of  $\text{BiVO}_4$  and  $\text{FeVO}_4$  for the  $\text{BiVO}_4/\text{FeVO}_4$  heterojunction nanophotocatalyst formation or may be due to morphology effect.

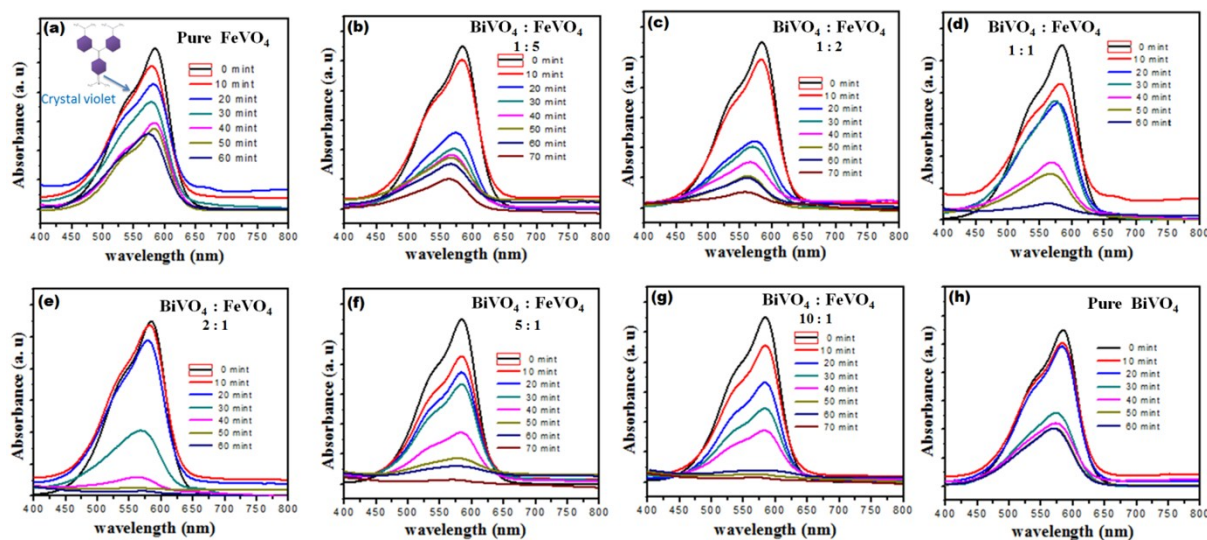

**Figure S4** The photocatalytic degradation of Crystal violet dye by  $\text{FeVO}_4$ ,  $\text{BiVO}_4$  and  $\text{BiVO}_4/\text{FeVO}_4$  hetero junction nanophotocatalyst at (a) Pure  $\text{FeVO}_4$ , (b) 1:5, (c) 1:2, (d) 1:1, (e) 2:1, (f) 5:1, (g) 10:1 mole ratio and (h) Pure  $\text{BiVO}_4$ .

From the above result and analysis it is observed that at 1:5 the degradation is 85 % in 70 mint, at 1:2 , 82 %, at 1:1, 98 % , at 2:1, 99.1 % , at 5:1, 97 % and at 10:1 is 98.6 %; the mole ratio 2:1 is the optimum concentration for  $\text{BiVO}_4/\text{FeVO}_4$  in this study.

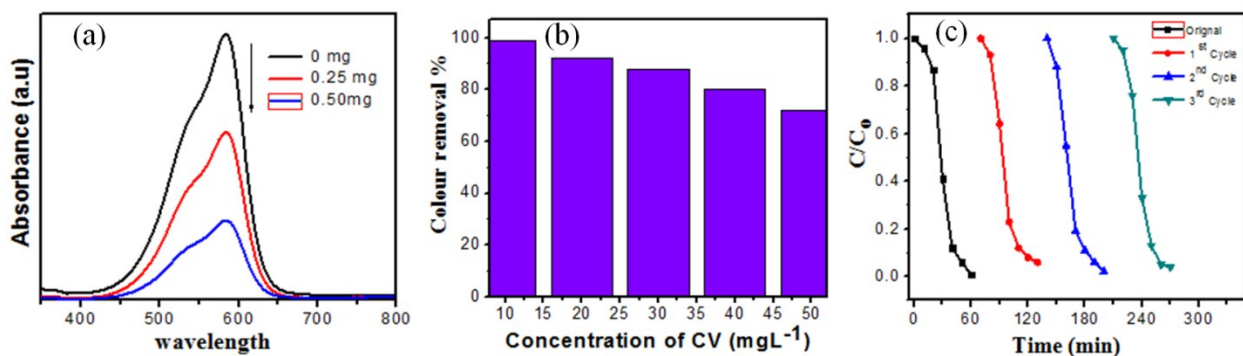

**Figure. S5** (a) Absorption spectra of CV solution at different concentration of  $\text{BiVO}_4/\text{FeVO}_4$  in 10mL CV solution, for 1h respectively. (b) Effect of the initial dye concentration on photocatalytic degradation of CV (c) Stability curves of the  $\text{BiVO}_4/\text{FeVO}_4$  photocatalyst for CV dye under visible light

## References:

1. D. V. Bavykin, V. N. Parmon, A. A. Lapkin and F. C. Walsh, *Journal of Materials Chemistry*, 2004, **14**, 3370-3377.
2. S. B. Khan, M. Hou, S. Shuang and Z. Zhang, *Applied Surface Science*, 2017, **400**, 184-193.
3. M. F. H. Al-Kadhemy, W. H. Abaas and I. Fakher, *Caspian Journal of Applied Sciences Research*, 2013, **2**.
4. S. Mani and R. N. Bharagava, in *Reviews of Environmental Contamination and Toxicology*, Springer, 2016, **237**, 71-104.
5. L. S. Zhang, T. F. Long, C. Q. Yan, X. C. He, M. L. Cheng and S. Zhong, *Advanced Materials Research*, 2013, **662**, 372-378.
